# Supplementary figures and images for: Assessment of machine learning-based approaches to improve sub-seasonal to seasonal forecasting of precipitation in Senegal
Source: Copernicus journal article supplement (doi:10.5194/egusphere-2024-4040), 2025-02-28

MAE MLP (1982-2019)

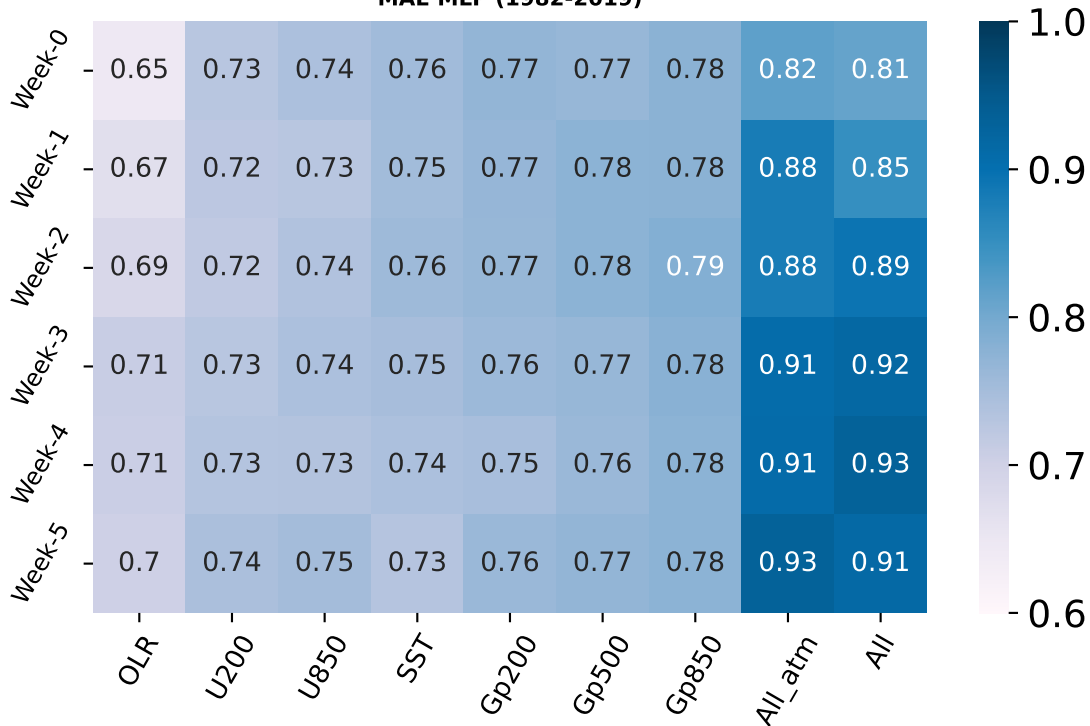

Supplement: Supplementary file 1 [file egusphere-2024-4040-supplement.zip]

ACC SVR (1982-2019)

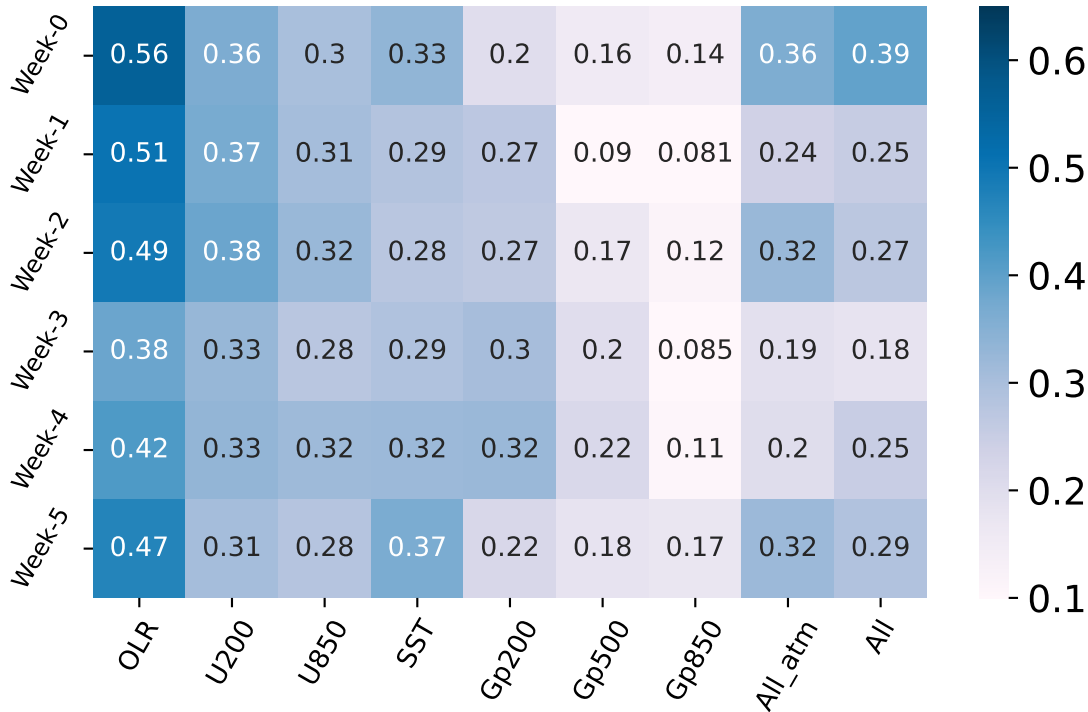

Supplement: Supplementary file 2 [file egusphere-2024-4040-supplement.zip]

MAE Adaboost (1982-2019)

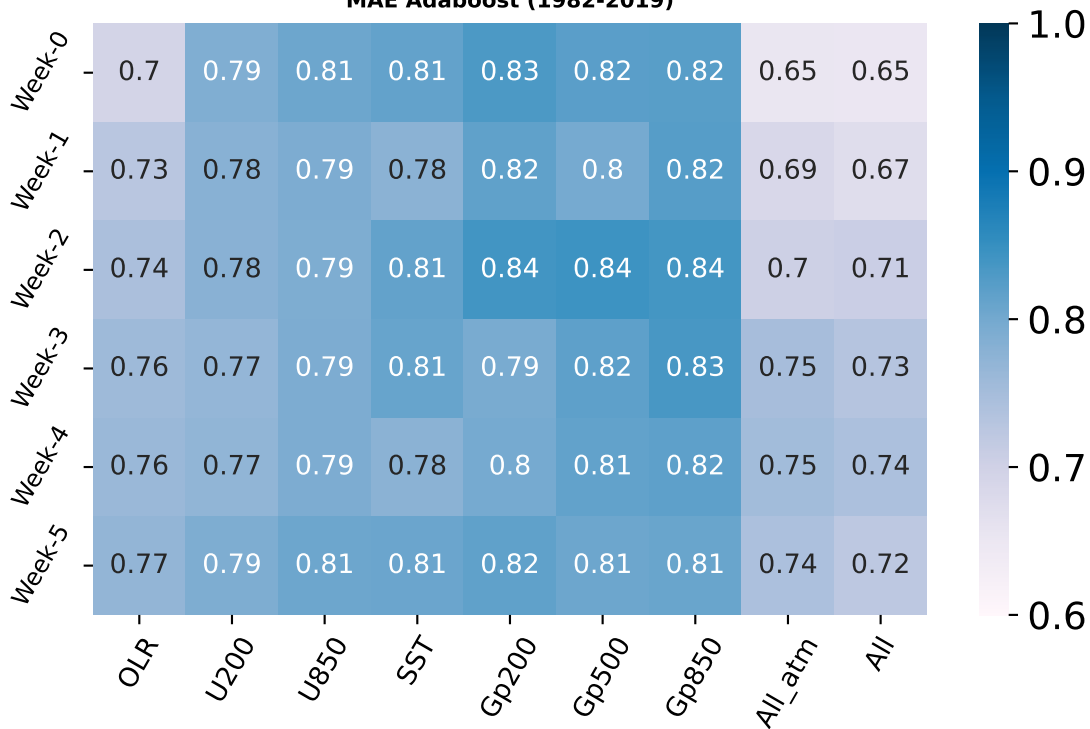

Supplement: Supplementary file 3 [file egusphere-2024-4040-supplement.zip]

ACC LR (1982-2019)

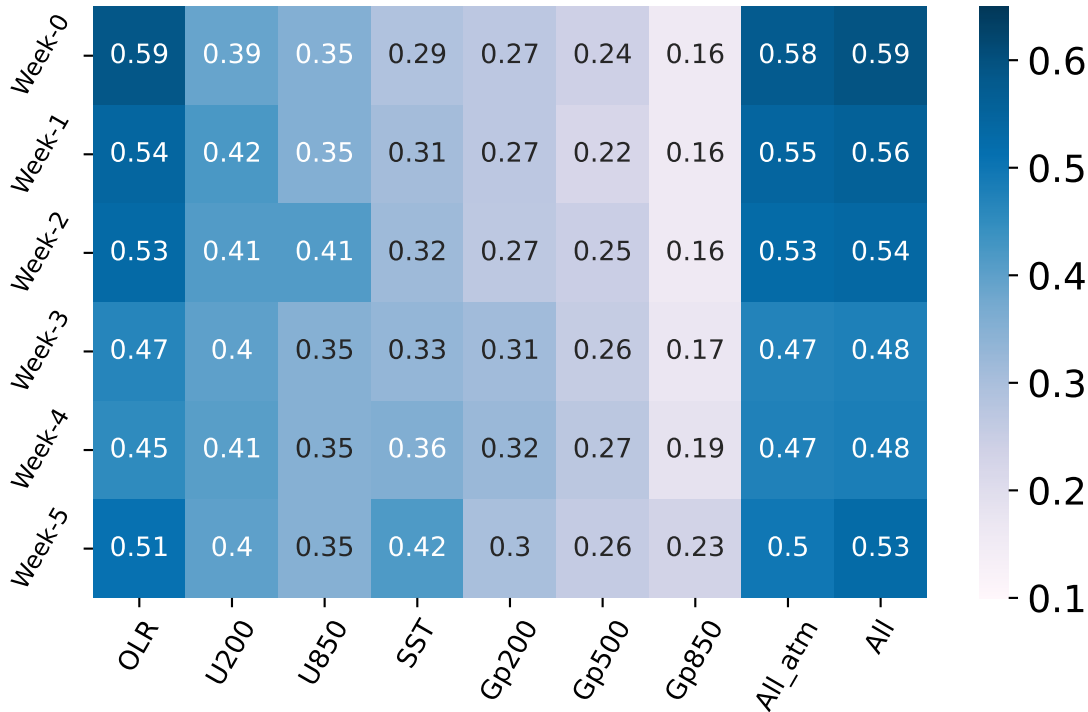

Supplement: Supplementary file 4 [file egusphere-2024-4040-supplement.zip]

ACC RF (1982-2019)

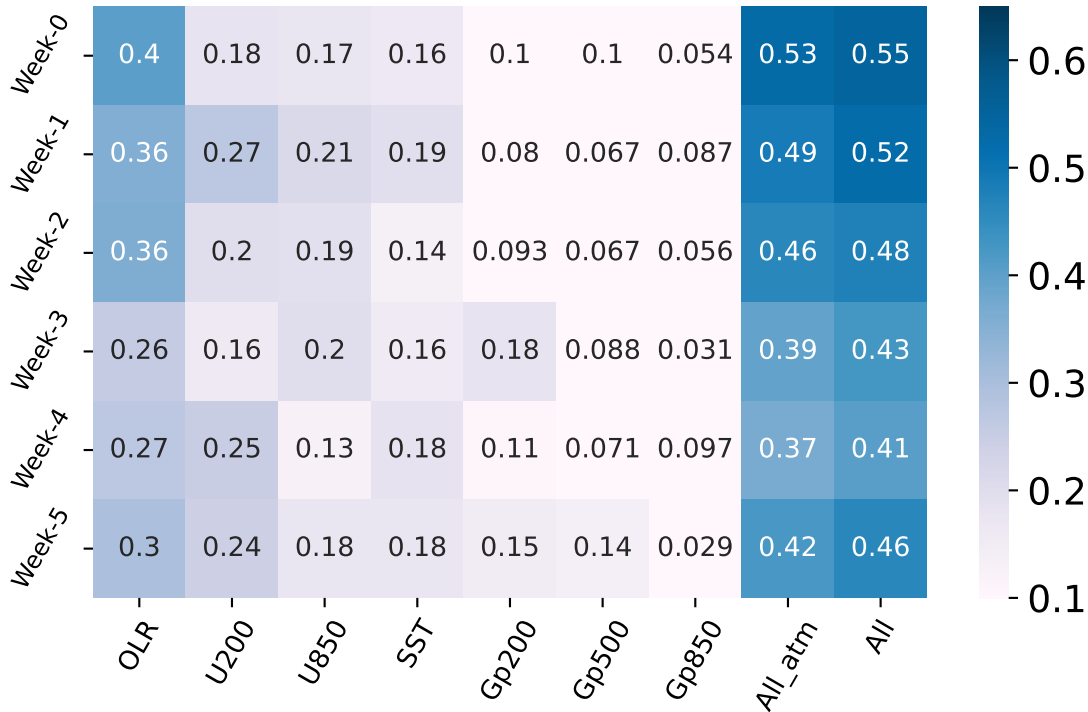

Supplement: Supplementary file 5 [file egusphere-2024-4040-supplement.zip]

MAE RF (1982-2019)

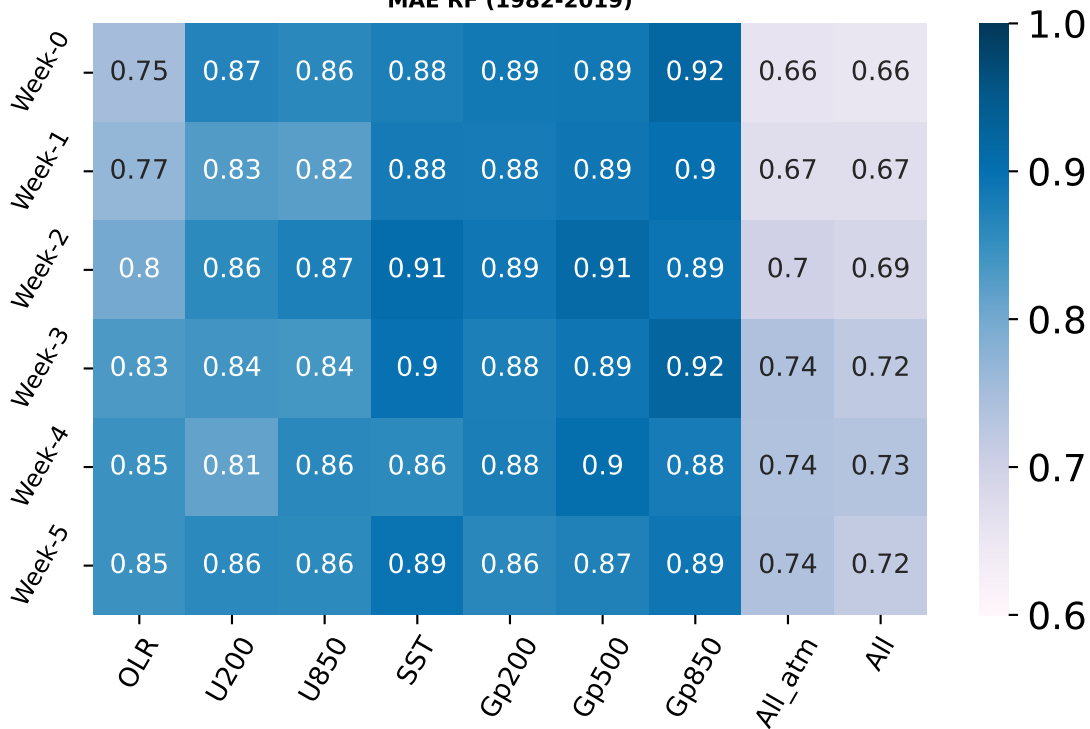

Supplement: Supplementary file 6 [file egusphere-2024-4040-supplement.zip]

MAE LR (1982-2019)

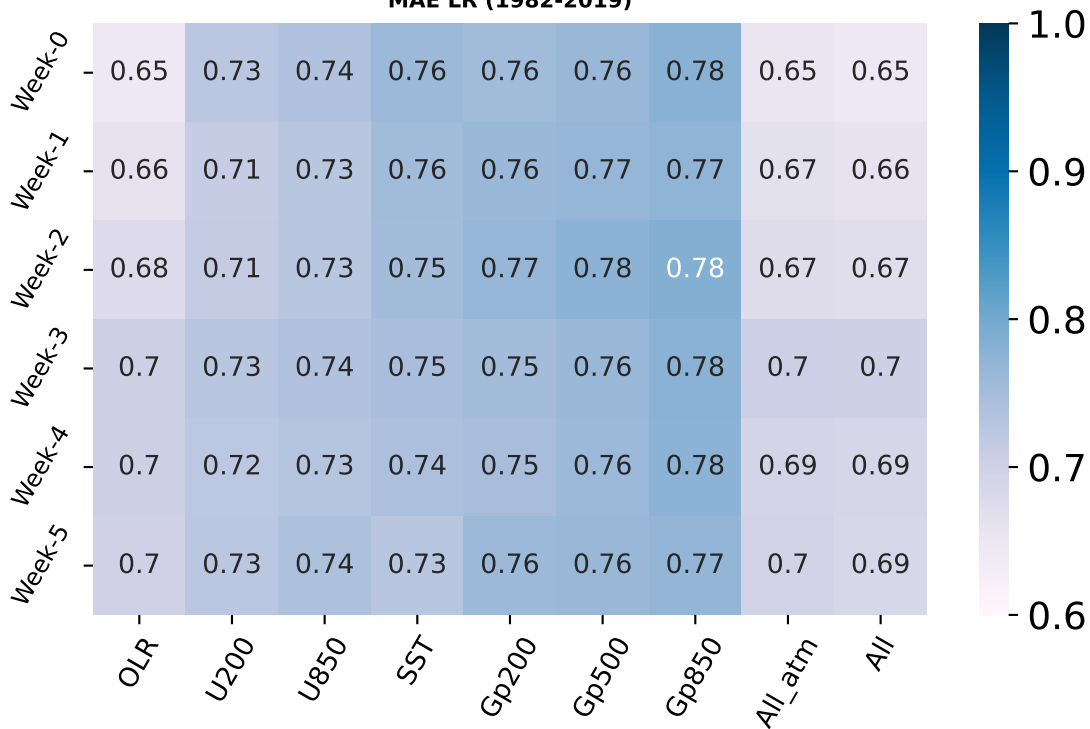

Supplement: Supplementary file 7 [file egusphere-2024-4040-supplement.zip]

ACC MLP (1982-2019)

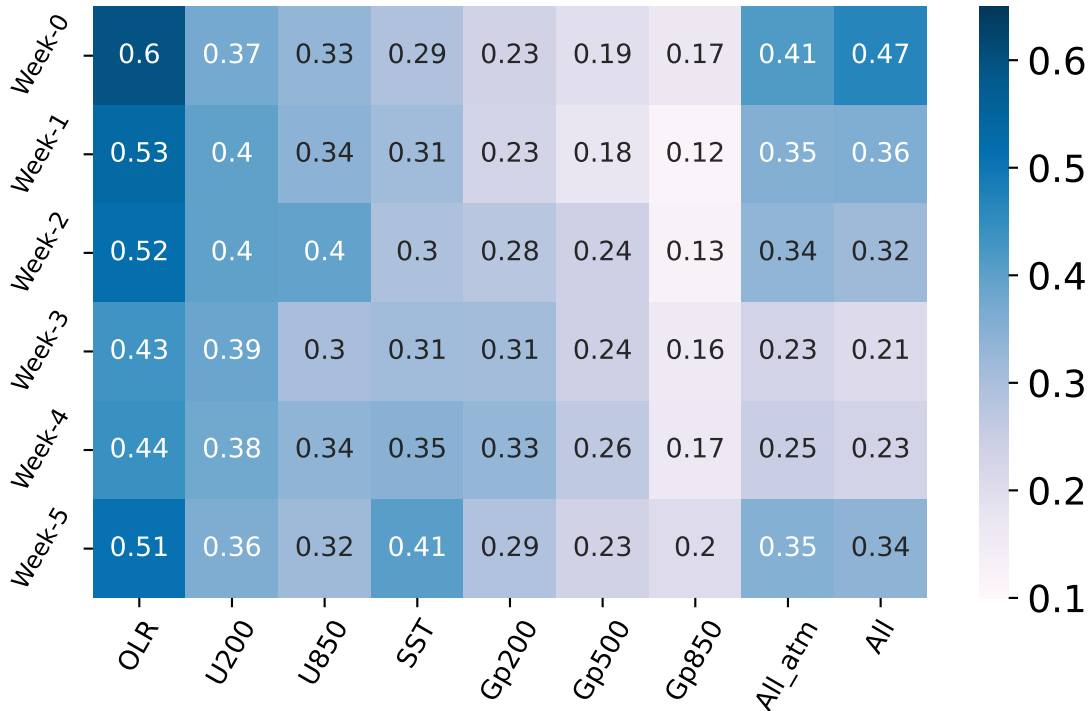

Supplement: Supplementary file 8 [file egusphere-2024-4040-supplement.zip]

MAE Ridge (1982-2019)

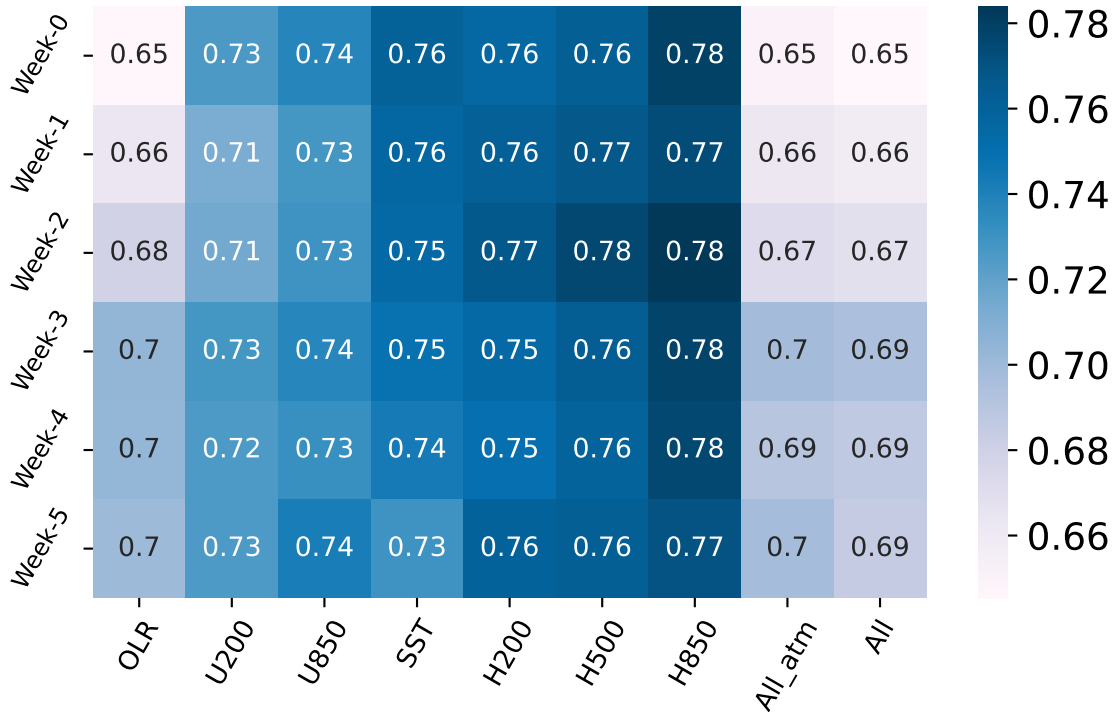

Supplement: Supplementary file 9 [file egusphere-2024-4040-supplement.zip]

ACC Adaboost (1982-2019)

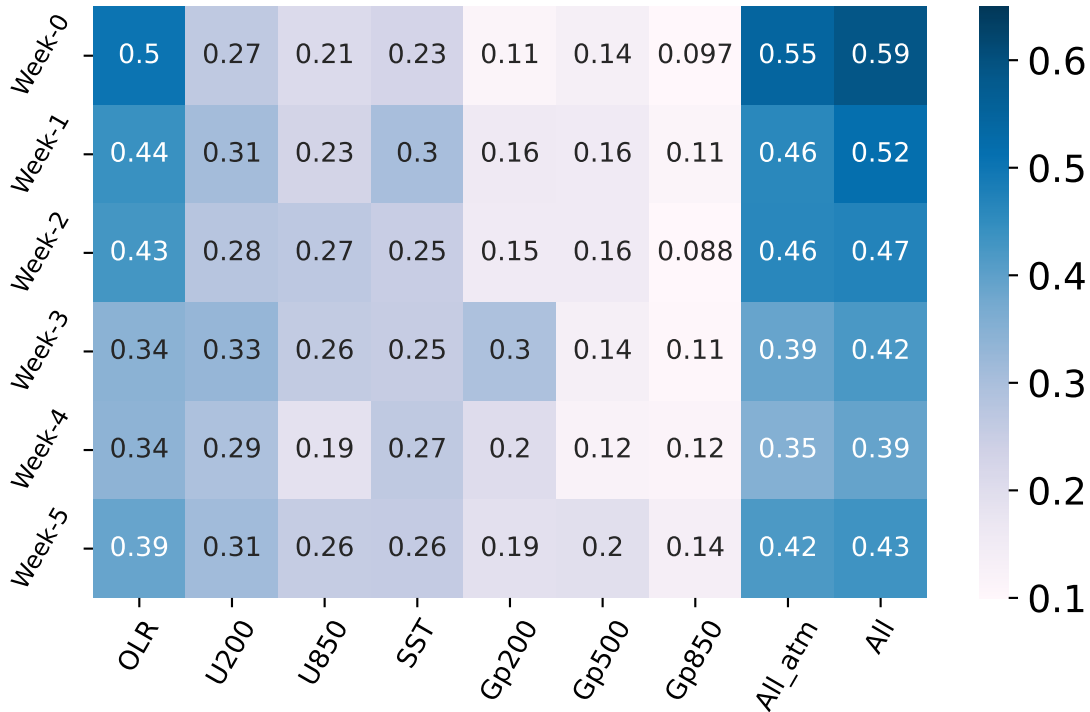

Supplement: Supplementary file 10 [file egusphere-2024-4040-supplement.zip]
